# Supplementary material
Source: publisher figshare collection journal article supplement (https://tandf.figshare.com/articles/dataset/_/3689142)
Supplement: Supplementary file 1 [file 1]

Archive with 2 entries (2 files):
- cres_a_980800_sm6015.pdf
- cres_a_980800_sm8726.pdf
