# Supplementary material
Source: publisher figshare collection journal article supplement (https://tandf.figshare.com/articles/dataset/_/3689142)
Supplement: Supplementary file 1 [file 1 › cres_a_980800_sm8726.pdf]

# **A Tale of Two Regionalisms: Improving the Measurement of Regionalism in Australia and Beyond**

**A J Brown, *Professor of Public Policy & Law, Centre for Governance & Public Policy,  
Griffith University***

**Jacob Deem, *Centre for Governance & Public Policy, Griffith University***

## **Appendix**

**Figure 1. Evolution of Australia's colonial/federal divisions, 1788-present**

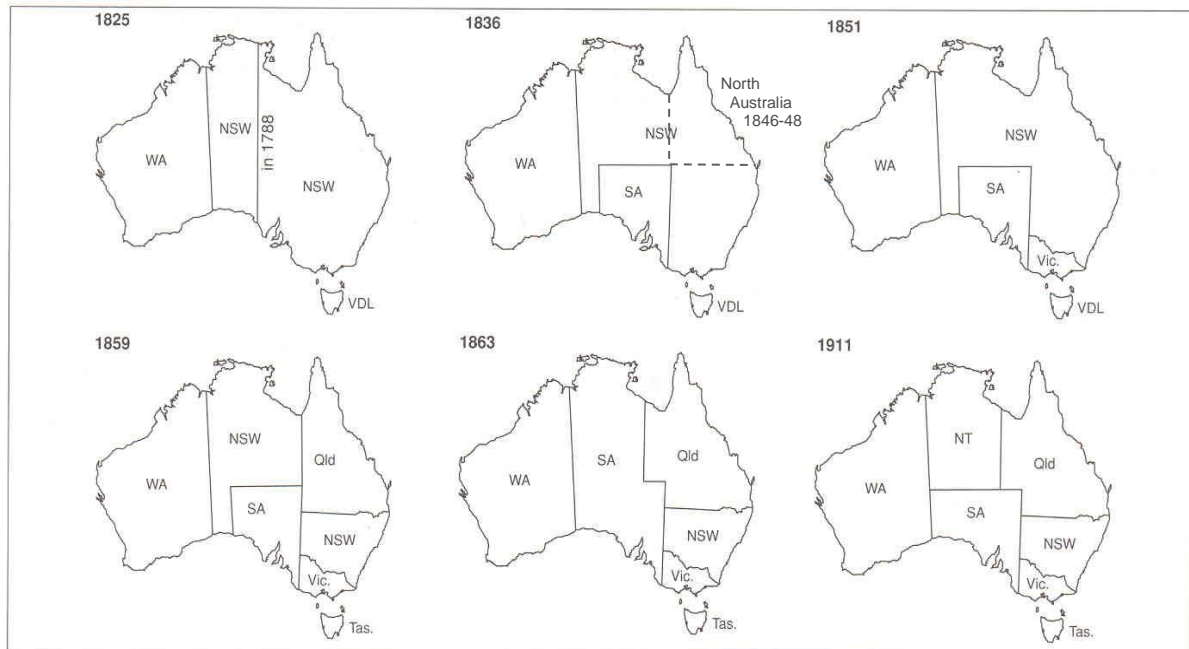

5.1 Boundaries of states and territories  
(NSW: New South Wales; NT: Northern Territory; Qld: Queensland; SA: South Australia; Tas.: Tasmania; VDL: Van Diemen's Land; Vic.: Victoria; WA: Western Australia). In 1911 the Australian Capital Territory was excised from New South Wales.

Source: MACINTYRE, S. (1999). *A Concise History of Australia*.  
Cambridge University Press, p.96, as corrected by authors

**Figure 2. ‘Region-regions’: Regional Development Australia committees (2013)**

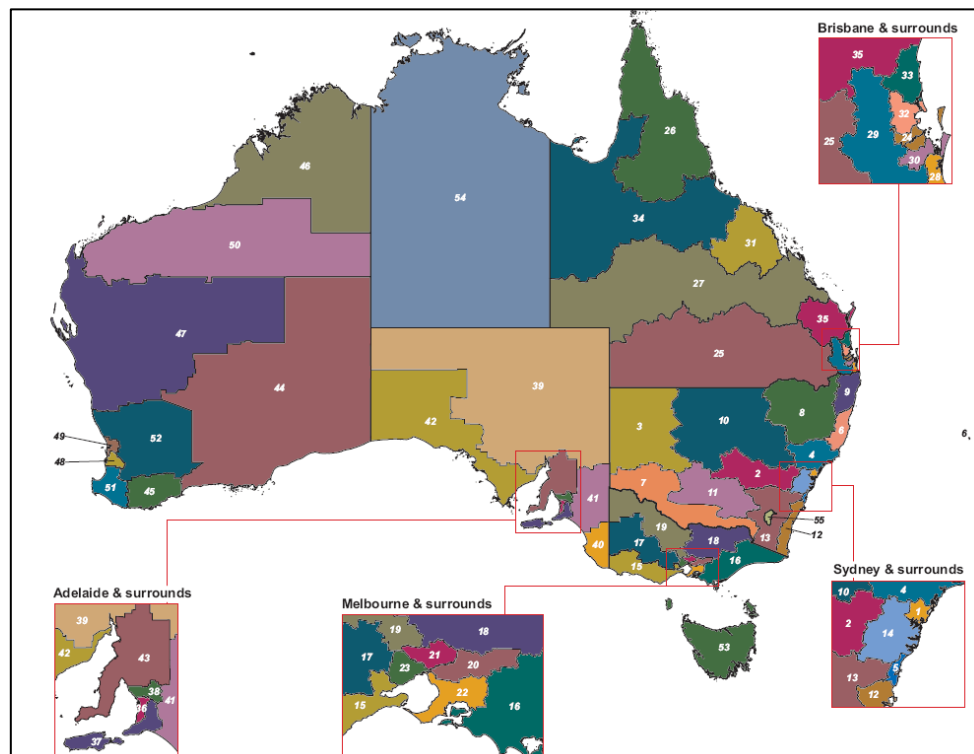

Source: <http://rda.gov.au/rda-region-maps> <viewed 29 August 2013>

**Table 1. Correlations between sense of belonging/attachment and (a) performance/trust and confidence in that level; (b) support for retaining that level of government**

|                                                                                             | Federal level | State level | Local level |
|---------------------------------------------------------------------------------------------|---------------|-------------|-------------|
| (a) 2008<br>(Strength of <i>belonging</i> /<br>perceived performance of level)              | .118**        | .128**      | .076**      |
| 2012<br>(Strength of <i>attachment</i> /<br>trust and confidence in level to do a good job) | .096**        | .047        | .069*       |
| (b) 2008<br>(Strength of <i>belonging</i> /<br>prefer to retain level in future)            | .083*         | .111**      | .070**      |
| 2012<br>(Strength of <i>attachment</i> /<br>prefer to retain level in future)               | -.068*        | -.050       | .006        |

\*  $p < .005$ ; \*\*  $p < .001$

**Table 2. Bivariate correlations for attachment to scales (2012, unweighted)**

|           | Local | Region           | State           | Australia        |
|-----------|-------|------------------|-----------------|------------------|
| Local     | 1.00  | .618*<br>N= 1127 | .312*<br>N=1211 | .154*<br>N=1214  |
| Region    |       | 1.00             | .481*<br>N=1127 | .178*<br>N= 1130 |
| State     |       |                  | 1.00            | .316*<br>N=1214  |
| Australia |       |                  |                 | 1.00             |

\*p < .001; 'Don't Know' responses excluded. Pairwise deletion applied to address invalid responses.

**Table 3. Breakdown of Regionalism Groups for Comparison (2012)**

| Group                          | Attachment Question                                                      | Moreno Question                     | n   | Total |
|--------------------------------|--------------------------------------------------------------------------|-------------------------------------|-----|-------|
| State-Regionalist              | State stronger than regional                                             | 'More as a person from (State)'     | 94  | 477   |
|                                | Equal State and region                                                   | 'More as a person from (State)'     | 259 |       |
|                                | Regional stronger than State                                             | 'More as a person from (State)'     | 42  |       |
|                                | State stronger than regional                                             | 'Don't Know/ Refused'               | 82  |       |
| Dual-Regionalist               | State stronger than regional                                             | 'Equally from (State) and (Region)' | 38  | 260   |
|                                | Equal to State and region                                                | 'Equally from (State) and (Region)' | 152 |       |
|                                | Regional stronger than State                                             | 'Equally from (State) and (Region)' | 54  |       |
|                                | Equal State and region                                                   | 'Don't Know/ Refused'               | 16  |       |
| Region-Regionalist             | State stronger than regional                                             | 'More as a person from (Region)'    | 27  | 428   |
|                                | Equal State and region                                                   | 'More as a person from (Region)'    | 272 |       |
|                                | Regional stronger than State                                             | 'More as a person from (Region)'    | 125 |       |
|                                | Regional stronger than State                                             | 'Don't Know / Refused'              | 4   |       |
| Non-Regionalist/<br>Don't Know | Not very or not at all to both State and region; or Don't Know / Refused | 'Don't Know / Refused'              | 54  | 54    |
|                                |                                                                          |                                     |     | 1219  |

**Table 4. Federal Political Culture Measures of ACVS (BROWN, 2012a, b)**

| %                                                                                                   |      | Desirable<br>(Very/Somewhat) | Undesirable<br>(Somewhat/Very) | Neither/Don't Know |
|-----------------------------------------------------------------------------------------------------|------|------------------------------|--------------------------------|--------------------|
| Having power divided up between different levels of government                                      | 2008 | 68.5                         | 25.4                           | 6.2                |
|                                                                                                     | 2010 | 67.5                         | 26.9                           | 5.5                |
|                                                                                                     | 2012 | 69.3                         | 24.1                           | 6.6                |
| Allowing different laws in response to varying needs and conditions in different parts of Australia | 2008 | 59.3                         | 36.1                           | 4.6                |
|                                                                                                     | 2010 | 56.3                         | 40.7                           | 3.3                |
|                                                                                                     | 2012 | 55.5                         | 41.5                           | 3.0                |
| Being able to elect different political parties at different levels of government                   | 2008 | 75.9                         | 19.2                           | 5.0                |
|                                                                                                     | 2010 | 81.7                         | 15.2                           | 3.1                |
|                                                                                                     | 2012 | 78.1                         | 16.6                           | 5.3                |
| Different governments arguing over who is responsible for a particular problem                      | 2008 | 19.1                         | 77.2                           | 3.8                |
|                                                                                                     | 2010 | 20.9                         | 75.9                           | 3.3                |
|                                                                                                     | 2012 | 17.3                         | 79.1                           | 3.5                |
